# Supplementary material
Source: Springer Nature journal article supplement (https://www.springermedizin.de/resource/supplementary/12890_2008_137_MOESM2_ESM.pdf/9506062)
Supplement: MOESM2 [file 9506062]

Table 2

Fold Change: average fold increase or decrease compared to average of wild-type arrays

Absolute Change: Wild-type array values subtracted from homozygote knockout array values

| Symbol                                                  | gene                                             | EntrezGene | Fold Change<br>+/- | -/-  | Absolute<br>Change |
|---------------------------------------------------------|--------------------------------------------------|------------|--------------------|------|--------------------|
| <b>Stress response or immune-related genes</b>          |                                                  |            |                    |      |                    |
| Atf3                                                    | activating transcription factor 3                | 11910      | -1.8               | -2.4 | -150               |
| Atf4                                                    | activating transcription factor 4                | 11911      | -1.2               | -1.3 | -230               |
| Cebpb                                                   | CCAAT/enhancer binding protein, beta             | 12608      | -1.5               | -1.5 | -480               |
| Cebpbdb                                                 | CCAAT/enhancer binding protein, delta            | 12609      | -1.7               | -2.2 | -970               |
| Chka                                                    | choline kinase alpha                             | 12660      | -1.2               | -1.4 | -160               |
| Csf3r                                                   | colony stimulating factor 3 receptor             | 12986      | -3.2               | -2.2 | -100               |
| Dusp1                                                   | dual specificity phosphatase 1                   | 19252      | -1.5               | -1.6 | -1280              |
| Gadd45g                                                 | growth arrest and DNA-damage 45 gamma            | 23882      | -1.8               | -2.3 | -160               |
| Il1b                                                    | interleukin 1 beta                               | 16176      | -3.4               | -3.3 | -220               |
| Il8rb                                                   | interleukin 8 receptor, beta                     | 12765      | -6.0               | -4.7 | -160               |
| Klf15                                                   | Kruppel-like factor 15                           | 66277      | -1.5               | -1.6 | -240               |
| Klf2                                                    | Kruppel-like factor 2 (lung)                     | 16598      | -1.1               | -1.2 | -400               |
| Klf3                                                    | Kruppel-like factor 3 (basic)                    | 16599      | -1.2               | -1.3 | -170               |
| Lpin2                                                   | lipin 2                                          | 64898      | -1.1               | -1.3 | -140               |
| Mat2a                                                   | methionine adenosyltransferase II, alpha         | 232087     | -1.1               | -1.3 | -290               |
| Myd116                                                  | myeloid differentiation gene 116                 | 17872      | -1.3               | -1.5 | -200               |
| Nfkbia                                                  | nuclear factor of kappa inhibitor, alpha         | 18035      | -1.5               | -1.6 | -780               |
| Nr4a1                                                   | nuclear receptor subfamily 4, group A, member 1  | 15370      | -1.2               | -1.5 | -380               |
| Nr4a2                                                   | nuclear receptor subfamily 4, group A, member 2  | 18227      | -1.7               | -2.1 | -130               |
| Plunc                                                   | palate, lung, and nasal carcinoma associated     | 18843      | 2.1                | 2.4  | 2030               |
| Ptpn6                                                   | protein tyrosine phosphatase 6                   | 15170      | 1.3                | 1.6  | 230                |
| Rasl11b                                                 | RAS-like, family 11, member B                    | 68939      | -1.2               | -1.3 | -160               |
| Slnf4                                                   | schlafen 4                                       | 20558      | -3.7               | -3.4 | -190               |
| Socs2                                                   | suppressor of cytokine signaling 2               | 216233     | -1.2               | -1.3 | -290               |
| Socs3                                                   | suppressor of cytokine signaling 3               | 12702      | -1.5               | -1.3 | -120               |
| Stfa2l1                                                 | stefin A2 like 1                                 | 268885     | -3.8               | -3.7 | -100               |
| Stk17b                                                  | serine/threonine kinase 17b                      | 98267      | -1.4               | -1.4 | -190               |
| Tiparp                                                  | TCDD-inducible poly(ADP-ribose) polymerase       | 99929      | -1.2               | -1.4 | -150               |
| Tnfaip3                                                 | tumor necrosis factor, alpha-induced protein 3   | 21929      | -1.4               | -1.5 | -110               |
| Tsc22d3                                                 | TSC22 domain family 3                            | 14605      | -1.3               | -1.5 | -230               |
| Wasf2                                                   | WAS protein family, member 2                     | 242687     | -1.2               | -1.2 | -130               |
| Zfp36                                                   | zinc finger protein 36                           | 22695      | -2.1               | -1.9 | -520               |
| <b>Muscle structure, vasoreactivity, actin dynamics</b> |                                                  |            |                    |      |                    |
| Actc1                                                   | actin, alpha, cardiac                            | 11464      | 1.2                | 1.4  | 880                |
| Aldoa                                                   | aldolase 1, A isoform                            | 11674      | 1.0                | 1.3  | 230                |
| Arid5b                                                  | AT rich interactive domain 5B (Mrf1 like)        | 71371      | -1.3               | -1.3 | -110               |
| Arl4c                                                   | ADP-ribosylation factor-like 7                   | 320982     | -1.3               | -1.3 | -120               |
| Calcr1                                                  | calcitonin receptor-like                         | 54598      | 1.5                | 1.7  | 200                |
| Chd3                                                    | chromodomain helicase DNA binding protein 3      | 216848     | -1.4               | -1.9 | -360               |
| Cnn1                                                    | calponin 1                                       | 12797      | 1.3                | 1.4  | 160                |
| Csrp3                                                   | cysteine and glycine-rich protein 3              | 13009      | 1.4                | 1.9  | 200                |
| Dgat2                                                   | diacylglycerol O-acyltransferase 2               | 67800      | 1.5                | 1.6  | 110                |
| Dgkh                                                    | Diacylglycerol kinase, eta                       | 380921     | -1.2               | -1.3 | -180               |
| Edn1                                                    | endothelin 1                                     | 13614      | -1.6               | -1.8 | -450               |
| HSPB6                                                   | heat shock protein, alpha-crystallin-related, B6 | 243912     | 1.2                | 2.1  | 190                |
| Ifrd2                                                   | Interferon-related developmental regulator 1     | 15982      | -1.2               | -1.3 | -120               |
| Ivns1abp                                                | influenza virus NS1A binding protein             | 117198     | 1.0                | 1.3  | 190                |
| Kcne4                                                   | potassium voltage-gated channel, Isk-related 4   | 57814      | -1.4               | -1.7 | -90                |
| Kcnj15                                                  | potassium inwardly-rectifying channel, J15       | 16516      | -1.3               | -1.4 | -130               |
| Klf4                                                    | Kruppel-like factor 4 (gut)                      | 16600      | -1.3               | -1.4 | -430               |
| Mb                                                      | myoglobin                                        | 17189      | 1.9                | 2.9  | 570                |
| Myh11                                                   | myosin, heavy polypeptide 11, smooth muscle      | 17880      | 1.2                | 1.3  | 210                |
| Pde4b                                                   | phosphodiesterase 4B, cAMP specific              | 18578      | -1.2               | -1.3 | -260               |
| Pfn1                                                    | profilin 1                                       | 18643      | 1.4                | 2.1  | 540                |
| Qk                                                      | quaking                                          | 19317      | -1.1               | -1.2 | -210               |
| RhoB                                                    | ras homolog gene family, member B                | 11852      | -1.2               | -1.3 | -550               |
| Rock2                                                   | Rho-associated coiled-coil forming kinase 2      | 19878      | -1.1               | -1.2 | -150               |
| Sfrs6                                                   | splicing factor, arginine/serine-rich 6          | 67996      | 1.1                | 1.2  | 280                |
| Sln                                                     | sarcolipin                                       | 66402      | 1.7                | 2.3  | 460                |
| Tcap                                                    | titin-cap                                        | 21393      | 1.6                | 2.0  | 160                |
| Tpm1                                                    | tropomyosin 1, alpha                             | 22003      | 1.3                | 1.6  | 510                |
| Tpm2                                                    | tropomyosin 2, beta                              | 22004      | 1.2                | 1.4  | 380                |
| Ttn                                                     | Titin                                            | 22138      | 1.5                | 2.3  | 540                |
| Unc45b                                                  | cardiomyopathy associated 4                      | 217012     | -1.3               | -1.7 | -170               |
